# Supplementary material for: An integrated electrochromic supercapacitor based on nanostructured Er-containing titania using an Er(iii)-doped polyoxotitanate cage
Source: Royal Society of Chemistry journal article supplement (doi:10.1039/c6qi00114a), 2016-01-01
Supplement: c6qi00114a1.pdf [file c6qi00114a1.pdf]

## Electronic Supplementary Information

### An integrated electrochromic supercapacitor based on nanostructured Er-containing titania using a Er(III)-doped polyoxotitanate cage

Yaokang Lv,<sup>a,c,d</sup> Weishi Du,<sup>a</sup> Yan Ren,<sup>a</sup> Zhiwei Cai,<sup>a</sup> Cheng Zhang<sup>a,\*</sup> Zuofeng Chen<sup>b,\*</sup> and Dominic S. Wright<sup>c,\*</sup>

---

College of Chemical Engineering and Materials Science, Zhejiang University of Technology, Hangzhou 310014, China. E-mail: czhang@zjut.edu.cn;

Department of Chemistry, Tongji University, Shanghai 200092, China. E-mail: zfchen@tongji.edu.cn;

Department of Chemistry, University of Cambridge, Lensfield Road, Cambridge CB2 1EW, UK. E-mail: dsw1000@cam.ac.uk;

Department of Chemistry, Tsinghua University, Beijing 100084, China;

---

#### Experimental Section

All chemicals were purchased from commercial sources and used as received, unless otherwise stated. Strict inert atmospheric conditions (dry and O<sub>2</sub>-free) were employed throughout all synthetic and handling procedures [i.e., vacuum-line and using a glove box (M. Braun Labstar)]. IR spectra were recorded using a Nicolet 6700 spectrometer (Thermo Fisher Nicolet, USA) with KBr pellets. Both carbon and hydrogen analyses were carried out using a varioMicro Elemental analyzer (Elementar Analysensysteme GmbH, Germany). Powder X-ray diffraction (XRD) experiments were performed using a X'Pert Pro diffractometer with Cu-K $\alpha$  radiation ( $\lambda$  = 1.5418 Å) operating at 40 kV and 40 mA and the scanning angle ranged from 10° to 90° of 2 $\theta$ . Scanning electron microscopy (SEM) images were collected using a field emission scanning electron microscope (Hitachi S-4800). Transmission electron microscopy (TEM) was performed with a FEI Tecnai G2 F30 electron microscope operating at an accelerating voltage of 300 kV. The surface compositions of sample **Er@TiO<sub>2</sub>-A** and **Er@TiO<sub>2</sub>-B** were determined by energy dispersive spectroscopy (EDS). EDS data were collected using an Thermo SCIENTIFIC energy dispersive X-ray spectroscopy system attached to a Hitachi S-4800 SEM, with an acceleration voltage of 15keV. X-ray photoelectron spectra (XPS) were operated on a spectrometer (Kratos AXIS Ultra DLD, Shimadzu, Japan). Thermal gravimetric analysis (TGA) was performed on a TGA Q5000 from TA Instruments.

#### Synthesis and Characterisation of **1**

Titanium ethoxide (> 97% Sigma-Aldrich, 3.5 ml, 15.4 mmol), ErCl<sub>3</sub> (99% Sigma-Aldrich, 0.274g, 1mmol) and anhydrous ethanol (Sigma-Aldrich, 5.0ml) were mixed in a Teflon-lined autoclave and heated at 150 °C for 3 days. Slow cooling to room temperature gave a pink solution. Pink block crystals of ErTi<sub>8</sub>O<sub>7</sub>(OEt)<sub>21</sub> (**1**) were obtained by further evaporation of the solution at room temperature for about four weeks, yield 0.23 g (14.3 % with respect to Er supplied). Elemental analysis found C 31.2, H 6.5; calcd. for **1**, C 31.4, H. 6.6. IR (800-4000 cm<sup>-1</sup>),  $\nu/\text{cm}^{-1}$  = 893.8(m), 920.6(m), 1051.7(vs), 1070.3(vs), 1147.5(vs), 1354.5(w), 1375.2(m), 1440.7(w), 2361(w), 2695.5(w), 2858.2(m), 2923.1(m), 2968.0(m), 3382.5(w).

### *Single Crystal X-ray Crystallography*

Crystal data were collected on a Bruker Smart Apex CCD diffractometer using Mo(K $\alpha$ ) radiation ( $\lambda$  = 0.71073 Å). The structures were solved by Direct Methods and refined by full-matrix least squares on  $F^2$ . (Ref: SHELX, G. M. Sheldrick, *Acta Crystallogr.* 2008, **A64**, 112). The hydrogen atoms were introduced to calculate positions and refine with fixed geometry with respect to their C atoms. The data and refinement are summarized and shown in Table **S1**. Selected bond lengths (Å) and angles (°) are shown in Table **S2**.

**Table S1.** Details of the structure solution and refinement of **1**.

| Compound                                                      | <b>1</b>                                                           |
|---------------------------------------------------------------|--------------------------------------------------------------------|
| Chemical formula                                              | <b>C<sub>42</sub>H<sub>105</sub>ErO<sub>28</sub>Ti<sub>8</sub></b> |
| <i>FW</i>                                                     | 1608.72                                                            |
| Crystal system                                                | Triclinic                                                          |
| Space group                                                   | <i>P</i> -1                                                        |
| Unit cell dimensions                                          | 3547.8(5)                                                          |
| <i>a</i> (Å)                                                  | 12.7613(11)                                                        |
| <i>b</i> (Å)                                                  | 13.6635(12)                                                        |
| <i>c</i> (Å)                                                  | 22.0141(17)                                                        |
| $\alpha$ (°)                                                  | 98.633(3)                                                          |
| $\beta$ (°)                                                   | 95.552(3)                                                          |
| $\gamma$ (°)                                                  | 108.856(2)                                                         |
| <i>V</i> (Å <sup>3</sup> )                                    | 1796.3(2)                                                          |
| <i>Z</i>                                                      | 2                                                                  |
| $\rho_{\text{calc}}$ (Mg/m <sup>3</sup> )                     | 1.506                                                              |
| $\mu$ (Mo-K $\alpha$ ) (mm <sup>-1</sup> )                    | 2.088                                                              |
| Goodness-of-fit on <i>F</i> <sub>2</sub>                      | 1.017                                                              |
| reflections collected                                         | 33108                                                              |
| independent reflections                                       | 12374                                                              |
| ( <i>R</i> <sub>int</sub> )                                   | (0.046)                                                            |
| <i>R</i> 1, <i>wR</i> 2 [ <i>I</i> > 2 $\sigma$ ( <i>I</i> )] | 0.0519,<br>0.1332                                                  |
| <i>R</i> 1, <i>wR</i> 2 (all data)                            | 0.0757,<br>0.1512                                                  |

**Table S2.** Selected bond lengths (Å) and angles (°).

| Bond      | Distance   | Bond      | Distance   |
|-----------|------------|-----------|------------|
| Er1—O3    | 2.305(4)   | Er1—O2    | 2.345(5)   |
| Er1—O1    | 2.311(4)   | Er1—O8    | 2.352(4)   |
| Er1—O4    | 2.339(5)   | Er1—O5    | 2.356(4)   |
| Er1—O6    | 2.345(4)   | Er1—O7    | 2.364(5)   |
| O3—Er1—O1 | 148.51(17) | O3—Er1—O8 | 131.90(17) |
| O3—Er1—O4 | 68.11(16)  | O1—Er1—O8 | 70.52(16)  |
| O1—Er1—O4 | 97.06(16)  | O4—Er1—O8 | 85.12(16)  |
| O3—Er1—O6 | 70.46(16)  | O6—Er1—O8 | 104.14(16) |
| O1—Er1—O6 | 131.87(16) | O2—Er1—O8 | 130.90(16) |
| O4—Er1—O6 | 130.77(16) | O3—Er1—O5 | 137.40(16) |
| O3—Er1—O2 | 96.92(17)  | O1—Er1—O5 | 65.03(16)  |
| O1—Er1—O2 | 68.03(16)  | O4—Er1—O5 | 152.77(16) |
| O4—Er1—O2 | 124.72(17) | O6—Er1—O5 | 68.35(15)  |
| O6—Er1—O2 | 85.30(17)  | O2—Er1—O5 | 69.51(16)  |
| O8—Er1—O5 | 69.91(16)  | O6—Er1—O7 | 69.97(16)  |
| O3—Er1—O7 | 65.08(16)  | O2—Er1—O7 | 152.92(16) |
| O1—Er1—O7 | 137.41(16) | O8—Er1—O7 | 68.31(15)  |

O4—Er1—O7

69.25(16)

O5—Er1—O7

109.19(16)

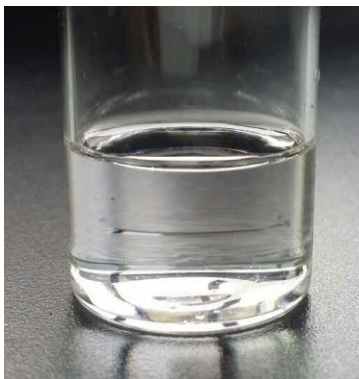

**Fig. S1.** 0.01 mol/L dichloromethane (DCM) solution of **1**.

*Preparation of Er@TiO<sub>2</sub>-A and Er@TiO<sub>2</sub>-B*

Dried crystals of **1** was sintered at 500 °C for 10 hour in a dry air flow, pink solids of Er(III)-doped TiO<sub>2</sub> was obtained, named **Er@TiO<sub>2</sub>-A**.

A 0.01 mol/L dichloromethane (DCM) solution of **1** were sprayed via 0.3 mm diameter airbrush and dried at room temperature. The obtained powder was further sintered at 500 °C for 10 hour in air flow and pink-white powder of Er(III)-doped TiO<sub>2</sub> was obtained, named **Er@TiO<sub>2</sub>-B**.

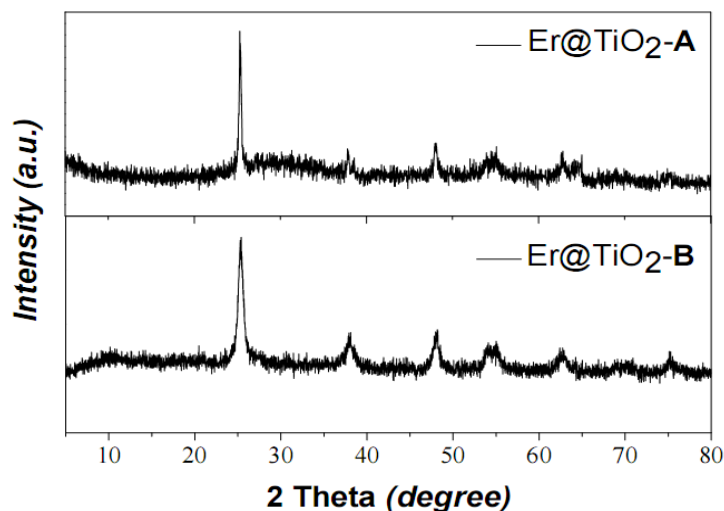

**Fig. S2.** Powder XRD results of **Er@TiO<sub>2</sub>-A** and **Er@TiO<sub>2</sub>-B**. The diffraction peaks at  $2\theta = 25.29^\circ, 37.81^\circ, 48.05^\circ, 55.07^\circ$  and  $62.70^\circ$  can be indexed to (1,0,1), (0,0,4), (2,0,0), (2,1,1) and (2,0,4) crystal planes of **1**, which denote anatase TiO<sub>2</sub> (JCPDS 21-1272).

As shown in Fig. S2, the broadening of the peak at full width half maximum is related to the average diameter ( $D$ ) of the particles according to Debye–Scherrer’s equation (Ref: L. S. Birks and H. Friedman, *J. Appl. Phys.* 1946, **17**, 687), i.e.  $D = 0.9\lambda / B \cos \theta$ , where  $\lambda$  is X-ray wavelength,  $B$  is line broadening measured at half height and  $\theta$  is Bragg angle. The average crystalline sizes are obtained from most predominant peak, corresponding to (1 0 1) reflection. The calculated average crystalline size of **Er@TiO<sub>2</sub>-A** is 26.84nm, which is larger than that of **Er@TiO<sub>2</sub>-B** (11.50nm).

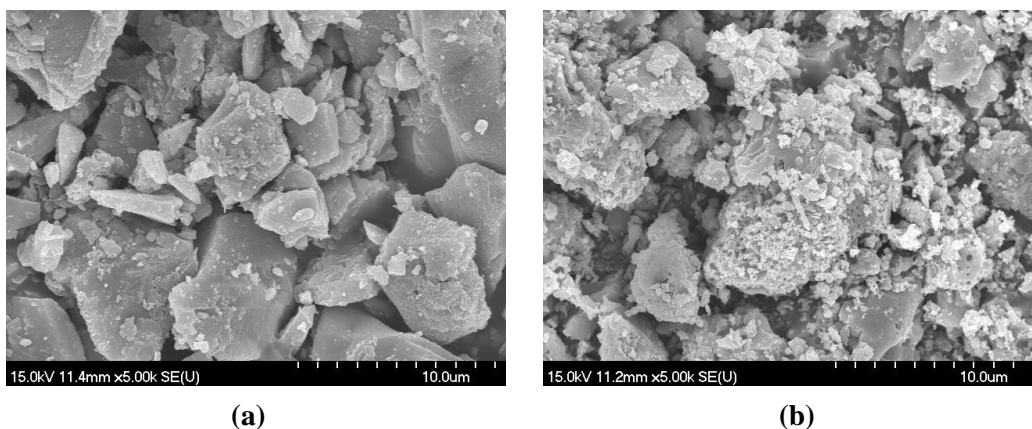

**Fig. S3.** (a) SEM image of **Er@TiO<sub>2</sub>-A**, (b) SEM image of **Er@TiO<sub>2</sub>-B**.

#### *XPS Analysis of **Er@TiO<sub>2</sub>-A** and **Er@TiO<sub>2</sub>-B***

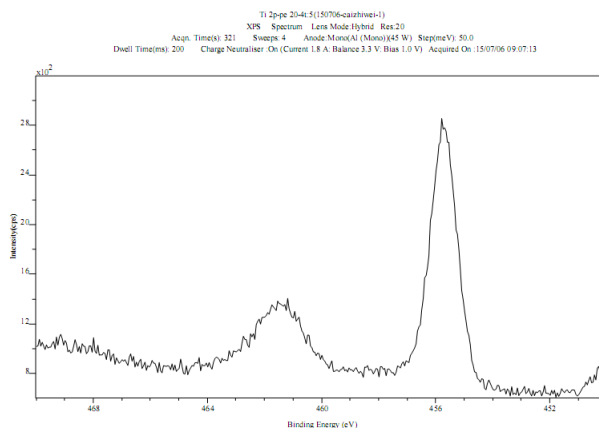

**Fig. S4.** XPS signal of **Er@TiO<sub>2</sub>-A** for Ti 2p region.

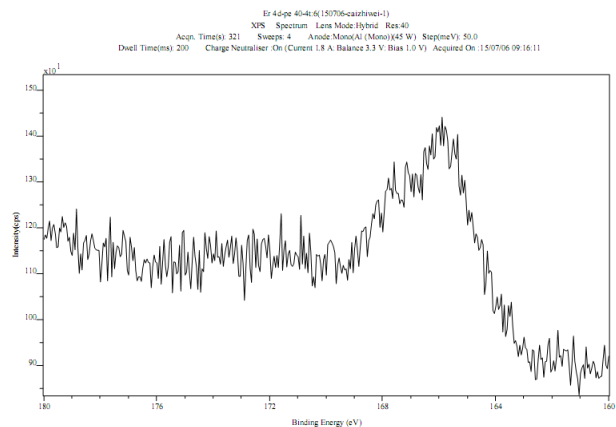

**Fig. S5.** XPS signal of **Er@TiO<sub>2</sub>-A** for Er 4*d* region.

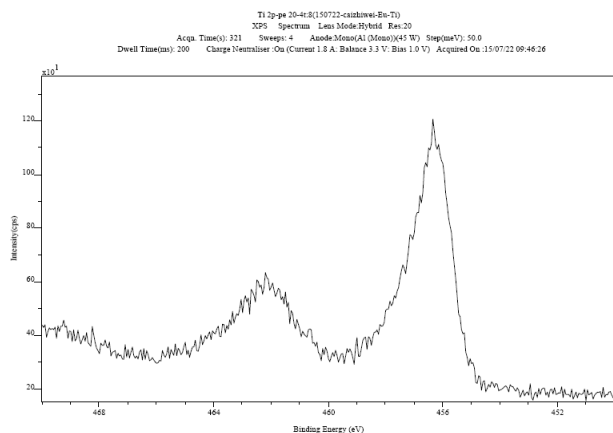

**Fig. S6.** XPS signal of **Er@TiO<sub>2</sub>-B** for Ti 2*p* region.

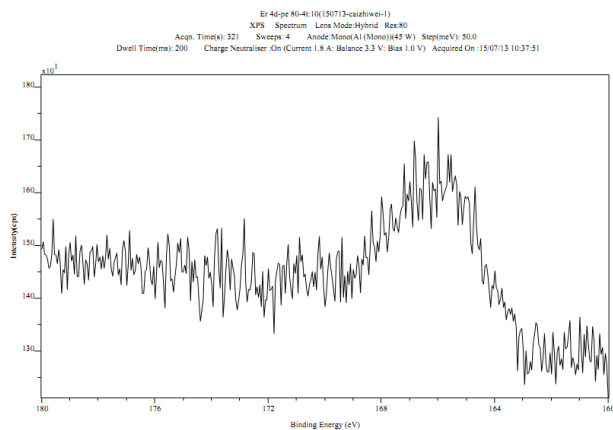

**Fig. S7.** XPS signal of **Er@TiO<sub>2</sub>-B** for Er 4*d* region.

# EDS Analysis of $\text{Er@TiO}_2\text{-A}$ and $\text{Er@TiO}_2\text{-B}$

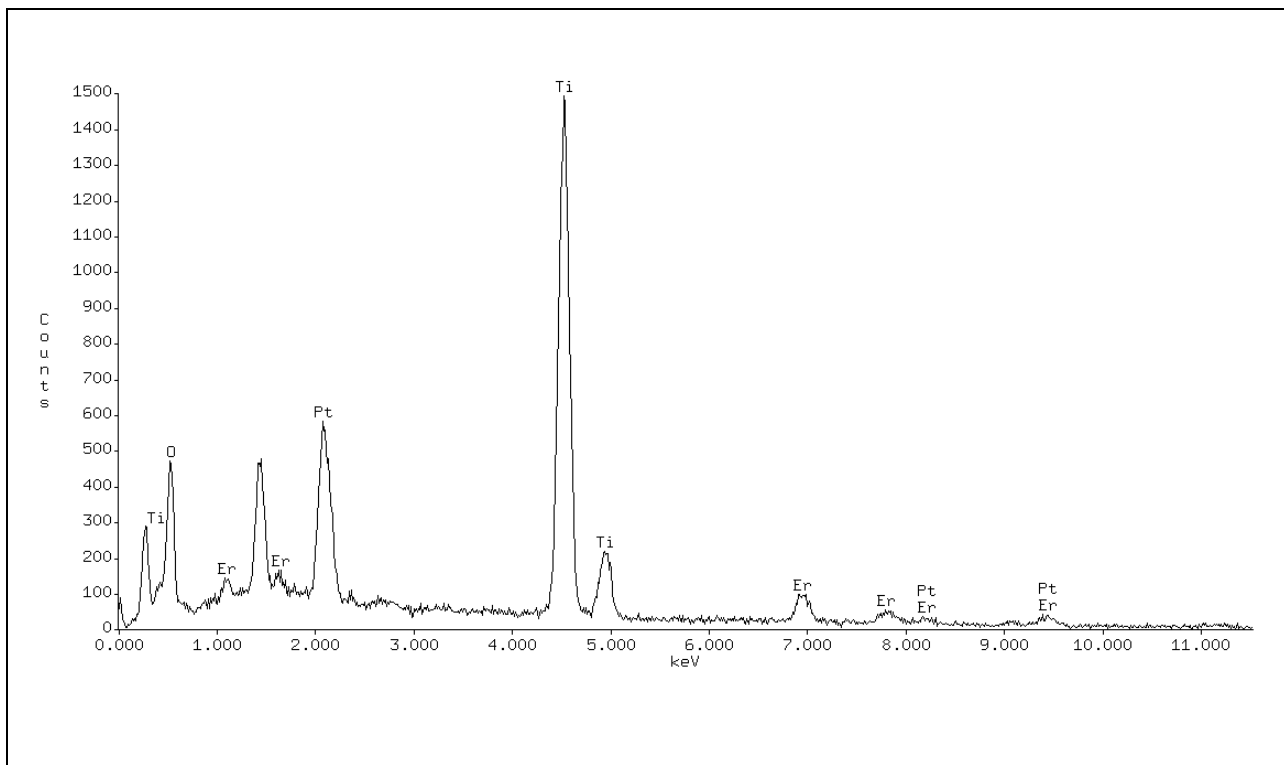

**Fig. S8.** EDS of  $\text{Er@TiO}_2\text{-A}$ .

**Table S3.** EDS of  $\text{Er@TiO}_2\text{-A}$ .

## Quantitative Analysis

PROZA Correction Acc.Volt.= 15 kV Take-off Angle=29.33 deg

Number of Iterations = 5

| Element | k-ratio<br>(calc.) | ZAF   | Atom % | Element<br>Wt % | Wt % Err.<br>(1-Sigma) | No. of<br>Cations |
|---------|--------------------|-------|--------|-----------------|------------------------|-------------------|
| O -K    | 0.0512             | 4.893 | 62.53  | 25.04           | +/- 0.47               | ---               |
| Ti-K    | 0.3238             | 1.061 | 28.65  | 34.36           | +/- 0.36               | 10.997            |
| Er-L    | 0.1123             | 1.302 | 3.49   | 14.63           | +/- 1.31               | 1.341             |
| Pt-L    | 0.1848             | 1.405 | 5.32   | 25.97           | +/- 4.59               | 2.041             |
| Total   |                    |       | 100.00 | 100.00          |                        | 14.379            |

The number of cation results are based upon 24 Oxygen atoms

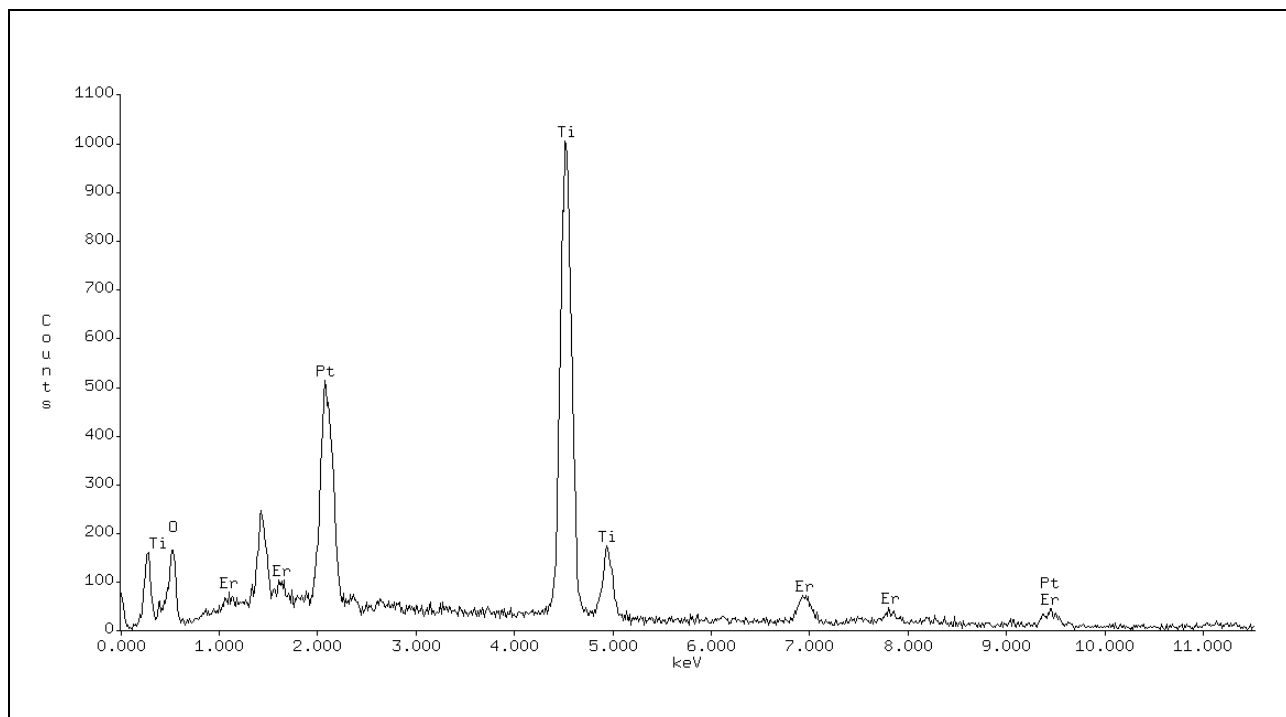

**Fig. S9.** EDS of Er@TiO<sub>2</sub>-B.

**Table S4.** EDS of Er@TiO<sub>2</sub>-B.

### Quantitative Analysis

PROZA Correction Acc.Volt.= 15 kV Take-off Angle=29.33 deg

Number of Iterations = 5

| Element | k-ratio<br>(calc.) | ZAF   | Atom % | Element<br>Wt % | Wt %<br>(1-Sigma) | Err. | No. of<br>Cations |
|---------|--------------------|-------|--------|-----------------|-------------------|------|-------------------|
| O -K    | 0.0298             | 5.001 | 48.54  | 14.89           | +/- 0.43          |      | ---               |
| Ti-K    | 0.3310             | 1.031 | 37.18  | 34.14           | +/- 0.44          |      | 18.381            |
| Er-L    | 0.1197             | 1.228 | 4.58   | 14.70           | +/- 1.61          |      | 2.266             |
| Pt-L    | 0.2773             | 1.308 | 9.70   | 36.28           | +/- 3.85          |      | 4.796             |
| Total   |                    |       | 100.00 | 100.00          |                   |      | 25.444            |

The number of cation results are based upon 24 Oxygen atoms



### Electrode preparation and cell assembling

Anatase nanoparticles (CAS no. 13463-67-7), purchased from aladdin industries corporation, were used as the control group for evaluating the lithium ion storage properties of **Er@TiO<sub>2</sub>-A** and **Er@TiO<sub>2</sub>-B**.

The working electrodes for electrochemical measurements were prepared by mixing the active material (**Er@TiO<sub>2</sub>-A**, **Er@TiO<sub>2</sub>-B** as well as anatase nanoparticles), polyvinylidene fluoride and carbon black with a weight ratio of 8:1:1 in N-methylpyrrolidone and then equably coated on the copper foil. After that, the electrode film was dried at 100 °C for 12 h and cut into discs with a diameter of 12 mm. The cycling cells were assembled by using **Er@TiO<sub>2</sub>-A** or **Er@TiO<sub>2</sub>-B** or anatase disc as working electrode, metal lithium foil as counter electrode, porous polypropylene fiber as separator and 1 mol/L LiPF<sub>6</sub> dissolved in a mixture of ethylene carbonate and dimethyl carbonate (1:1, v/v) as electrolyte. All the cells were assembled in an argon-filled glove box, where both moisture and oxygen levels were kept at less than 1 ppm.

### Electrochemical analysis

Galvanostatic charge/discharge experiments and rate performance of cells were measured on a multi-channel Land battery testing system at room temperature. Cyclic voltammograms (CVs) and electrochemical impedance spectroscopy (EIS) analysis were recorded on a CHI 660E electrochemical workstation at room temperature. China). The optical contrast and switching time of the composite film are carried out on a Shimadzu UV-1800 UV-vis spectrophotometer (Shimadzu, Japan).

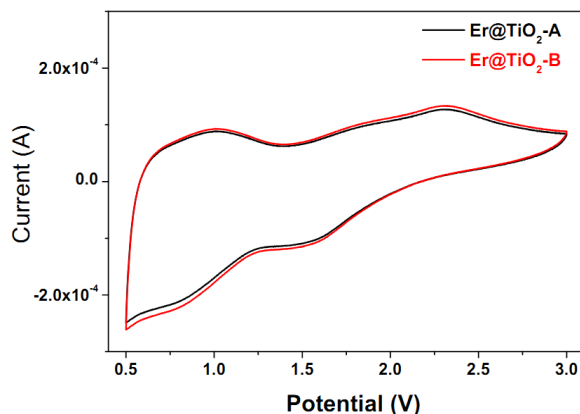

**Fig. S10.** CV curves (Voltage v.s. Li/Li<sup>+</sup>) of **Er@TiO<sub>2</sub>-A** and **Er@TiO<sub>2</sub>-B** at a scan rate of 2.0 mV s<sup>-1</sup>.

### *Preparation of $\text{Er@TiO}_2\text{-B}$ films*

Thin films of  $\text{Er@TiO}_2\text{-B}$  were spray-cast onto indium tin oxide (ITO) coated glass slides from 0.1 mol/L DCM solution of **1**, and sintered at 500 °C afterwards.

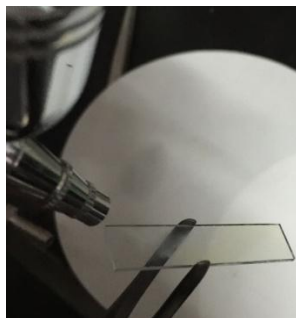

**Fig. S11.** Image of DCM solution of **1** spray-cast onto an ITO coated glass slide.

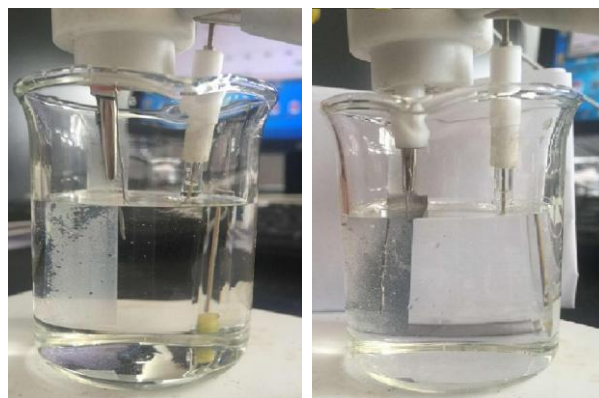

(a)

(b)

**Fig. S12.** bleached state (a) and colored state (b) of the  $\text{Er@TiO}_2\text{-B}$  film.

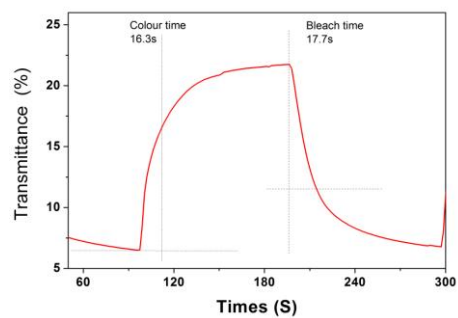

**Fig. S13.** Electrochromic switching response of  $\text{Er@TiO}_2\text{-B}$  film.

As shown in Fig. S13, the color-switching time of **Er@TiO<sub>2</sub>-B** film was estimated as the time taken for the absorbance to change by two-thirds of the difference between the steady-state absorbance in the colored and bleached states. The switching time was 16.3 s for coloration and 17.7 s for bleaching.

#### *Preparation of the PTBTPA film*

The poly(4,4',4''-tris[4-(2-bithienyl)phenyl]amine) (**PTBTPA**) film was prepared via electro-polymerization on the ITO glass substrate. The electro-polymerization route is similar with that described previously<sup>13b</sup>. As shown in **Scheme S1**, the **PTBTPA** film was obtained via the constant potential polymerization of 0.75 mmol/L 4,4',4''-tris[4-(2-bithienyl)phenyl]amine (**TBTPA**) and 0.1 mol/L tetrabutylammonium perchlorate (TBAP) in DCM/acetonitrile (ACN) solutions (7 : 3, by volume) at 1.2 V, which was performed in a conventional three compartment electrolysis cell with ITO substrate (the active area: 2.9 cm × 2.6 cm) as the working electrode, a platinum (Pt) sheet (4 cm<sup>2</sup>) as the counter electrode and a double-junction Ag/AgCl electrode (silver wire coated with AgCl in saturated KCl solution, 0.1 M TBAP in DCM/ACN solution as the second junction) as the reference electrode. The charge capacity of polymerization was controlled at 4 × 10<sup>-2</sup> C.

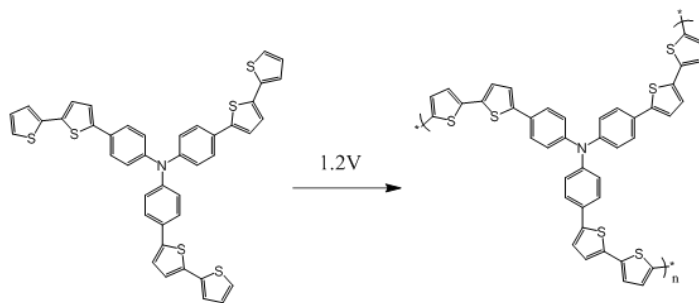

**Scheme S1.** Electro-polymerization route for **PTBTPA**.

#### *Preparation of LiClO<sub>4</sub>-PMMA gel*

The high viscosity gel electrolyte (LiClO<sub>4</sub>-PMMA gel) based on poly(methyl methacrylate) (PMMA) and lithium perchlorate (LiClO<sub>4</sub>) was plasticized by propylene carbonate to form a highly conducting and transparent gel. To ease the gel synthesis, the PMMA and LiClO<sub>4</sub> were first dissolved in acetonitrile (ACN). The composition of the casting solution was LiClO<sub>4</sub>/PMMA/PC/ACN in a ratio of 3:7:20:70 by weight.

(see Ref: I. Schwendeman, J. Hwang, D. M. Welsh, D. B. Tanner and J. R. Reynolds, *Adv. Mater.* 2001, **13**, 634-637.)

### Integration of electrochromic supercapacitor

A sandwich-like EC supercapacitor was assembled by stacking a **Er@TiO<sub>2</sub>-B** film and a **PTBTPA** film with LiClO<sub>4</sub>-PMMA (PMMA is polymethyl methacrylate) gel as electrolyte.

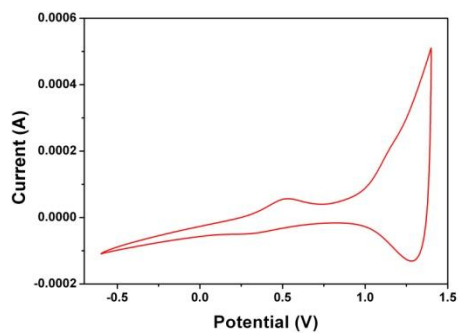

**Fig. S14.** CV curve of an as-prepared EC supercapacitor at a scan rate of 50 mV s<sup>-1</sup>.

CV curve of the EC supercapacitor exhibit two pairs of redox peaks around 0.5 V and 1.3 V, corresponding to ion insertion and extraction reactions in the electrode films.

**Table S5.** Table of areal capacitance at different current densities.

| current density (mA/cm <sup>2</sup> ) | areal capacitance (F/cm <sup>2</sup> ) |
|---------------------------------------|----------------------------------------|
| 0.5                                   | 0.020                                  |
| 0.75                                  | 0.018                                  |
| 1.0                                   | 0.016                                  |

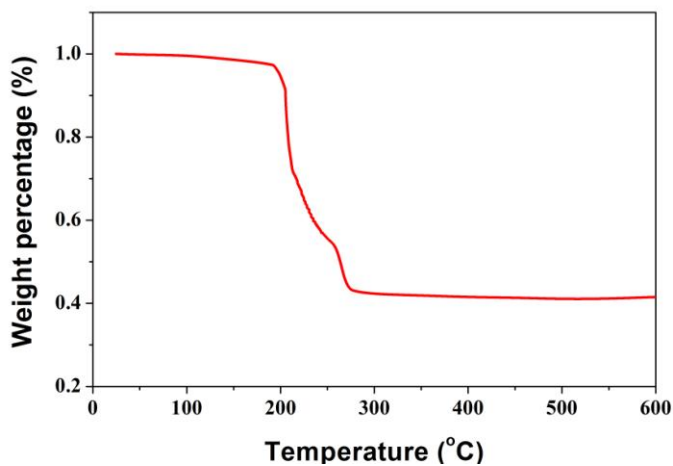

**Fig. S15.** TGA of cage **1** in air flow (50 mL/min) with temperature ramping rate of 5 °C/min.

The thermal stability of **1** was investigated using TGA, in the presence of an air flow. As shown in Fig. S15, weight loss from cage **1** takes place in several stages. The first stage occurs below 190 °C, corresponding to a ca. 3.0 wt% loss. This is assumed to be the result of the release of absorbed moisture from the sample surface. The second stage (ca. 54.0 wt%) occurs in the range 190–280 °C, possibly arising from the pyrolysis of the organic ligands of cage **1**. From 280 °C to 600 °C, the weight loss only (1.4 wt%), which could be due to some further decomposition of the remaining organic groups.

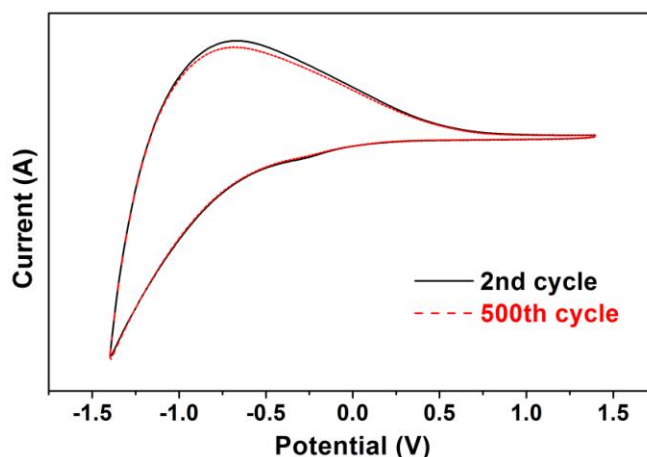

Fig. S16. Long-term stability of **Er@TiO<sub>2</sub>-B** film on the ITO electrode as a function of repeated scans in 0.1 M LiClO<sub>4</sub>/PC solution between -1.4 V and 1.4 V (voltage vs. Ag/AgCl). Scan rate: 100 mV/s.

Fig. S16 presents the stability curves of **Er@TiO<sub>2</sub>-B** electrode between -1.4V and 1.4 V for 500 cycles in 0.1 M LiClO<sub>4</sub>/PC solution. After 500 cycles, the **Er@TiO<sub>2</sub>-B** electrode retained 97.4% of its original electroactivity. **Er@TiO<sub>2</sub>-B** electrode exhibited higher cycle stability than reported mesoporous spherical TiO<sub>2</sub> electrode, which showed low cycle stability with a retention ratio of 91% after 100 cycles (Ref. 6d). This result implies that **Er@TiO<sub>2</sub>-B** electrode has good redox stability and would be a promising candidate material for EC supercapacitor.

**Table S6.** The optical contrast( $\Delta T$ ) and switching times for different TiO<sub>2</sub> electrodes.

| Electrode                      | Thickness /nm | $\Delta T$ / % | Color time/ s | Bleach time/ s |
|--------------------------------|---------------|----------------|---------------|----------------|
| TiO <sub>2</sub> nanowires     | about 350     | 28.20%         | 11.3          | 14.3           |
| TiO <sub>2</sub> nanoparticles | about 350     | 22.23%         | 23.7          | 18.5           |
| Er@TiO <sub>2</sub> -B         | about 1000    | 15.26%         | 16.3          | 17.7           |

As shown in Table S6, the optical contrast of **Er@TiO<sub>2</sub>-B** electrode was 15.26%, lower than reported<sup>[5e]</sup> TiO<sub>2</sub> nanowire electrode (28.20%) and TiO<sub>2</sub> nanoparticles electrode (22.23%); while the switching times of Er@TiO<sub>2</sub>-B electrode was 16.3 s for coloration and 17.7 s for bleaching, which was

slower than that of  $\text{TiO}_2$  nanowire electrode but faster than that of  $\text{TiO}_2$  nanoparticles electrode. This phenomenon may be due to the thickness of **Er@TiO<sub>2</sub>-B** electrode was much larger than that of  $\text{TiO}_2$  nanowires and  $\text{TiO}_2$  nanoparticles electrodes.
